# Supplementary material for: A new family of heterometallic [Cu6M4] (M = Gd, Tb, Dy and Y) clusters derived from the combined use of selected pyridyl poly-alcohol ligands
Source: Royal Society of Chemistry journal article supplement (doi:10.1039/d4dt02054e), 2024-01-01
Supplement: d4dt02054e1.pdf [file d4dt02054e1.pdf]

## ELECTRONIC SUPPORTING INFORMATION (ESI)

### **A New Family of Heterometallic [Cu<sub>6</sub>M<sub>4</sub>] (M = Gd, Tb, Dy and Y) Clusters Derived from the Combined use of Selected Pyridyl Poly-alcohol Ligands**

Antonis Anastassiades,<sup>a</sup> Dimitris I. Alexandropoulos,<sup>a,‡</sup> Christian D. Buch,<sup>b</sup> Stergios Piligkos,<sup>\*b</sup>  
A. J. Tasiopoulos<sup>\*a</sup>

<sup>a</sup>*Department of Chemistry, University of Cyprus, 1678 Nicosia, Cyprus.*

*E-mail: [atasio@ucy.ac.cy](mailto:atasio@ucy.ac.cy)*

<sup>b</sup>*Department of Chemistry, University of Copenhagen, DK-2100, Denmark.*

*E-mail: [piligkos@chem.ku.dk](mailto:piligkos@chem.ku.dk)*

<sup>‡</sup>*Current Address: Department of Chemistry, University of Patras, 26504 Patras, Greece.*

**Table of Contents**

***Single crystal X-Ray crystallography*.....3**

***Physical Measurements/Characterization* .....8**

***Magnetic measurements*.....11**

***References* .....14**

## Single crystal X-Ray crystallography

**Table S1.** Crystal data and structural refinement parameters for compounds **1·3MeCN**, **2·3MeCN**, **3·4MeCN** and **4·4MeCN**.

| Identification code                | 1·3MeCN                                                                                                                      | 2·3MeCN                                                                                                                      | 3·4MeCN                                                                                                                      | 4·4MeCN                                                                                                                      |
|------------------------------------|------------------------------------------------------------------------------------------------------------------------------|------------------------------------------------------------------------------------------------------------------------------|------------------------------------------------------------------------------------------------------------------------------|------------------------------------------------------------------------------------------------------------------------------|
| Empirical formula                  | C <sub>74</sub> H <sub>89</sub> Cu <sub>6</sub> Gd <sub>4</sub> N <sub>19</sub> O <sub>44</sub>                              | C <sub>74</sub> H <sub>89</sub> Cu <sub>6</sub> Tb <sub>4</sub> N <sub>19</sub> O <sub>44</sub>                              | C <sub>76</sub> H <sub>92</sub> Cu <sub>6</sub> Dy <sub>4</sub> N <sub>20</sub> O <sub>44</sub>                              | C <sub>76</sub> H <sub>92</sub> Cu <sub>6</sub> Y <sub>4</sub> N <sub>20</sub> O <sub>44</sub>                               |
| Formula weight                     | 2958.88                                                                                                                      | 2965.56                                                                                                                      | 3020.93                                                                                                                      | 2726.57                                                                                                                      |
| Temperature                        | 180(1) K                                                                                                                     | 150(1) K                                                                                                                     | 150(1) K                                                                                                                     | 150(1) K                                                                                                                     |
| Wavelength                         | 1.54184 Å                                                                                                                    | 1.54184 Å                                                                                                                    | 1.54184 Å                                                                                                                    | 1.54184 Å                                                                                                                    |
| Crystal system                     | Tetragonal                                                                                                                   | Tetragonal                                                                                                                   | Tetragonal                                                                                                                   | Tetragonal                                                                                                                   |
| Space group                        | P $\bar{4}$ 2 <sub>1</sub> c                                                                                                 |
| Unit cell dimensions               | a = 17.7047(2) Å<br>b = 17.7047(2) Å<br>c = 16.4257(2) Å<br>$\alpha = 90^\circ$<br>$\beta = 90^\circ$<br>$\gamma = 90^\circ$ | a = 17.5805(2) Å<br>b = 17.5805(2) Å<br>c = 16.5113(2) Å<br>$\alpha = 90^\circ$<br>$\beta = 90^\circ$<br>$\gamma = 90^\circ$ | a = 17.4530(2) Å<br>b = 17.4530(2) Å<br>c = 16.6568(2) Å<br>$\alpha = 90^\circ$<br>$\beta = 90^\circ$<br>$\gamma = 90^\circ$ | a = 17.7509(2) Å<br>b = 17.7509(2) Å<br>c = 16.2759(2) Å<br>$\alpha = 90^\circ$<br>$\beta = 90^\circ$<br>$\gamma = 90^\circ$ |
| Volume                             | 5148.74(9) Å <sup>3</sup>                                                                                                    | 5103.21(7) Å <sup>3</sup>                                                                                                    | 5073.78(7) Å <sup>3</sup>                                                                                                    | 5128.45(9) Å <sup>3</sup>                                                                                                    |
| Z                                  | 2                                                                                                                            | 2                                                                                                                            | 2                                                                                                                            | 2                                                                                                                            |
| Density (calculated)               | 1.909 g cm <sup>-3</sup>                                                                                                     | 1.930 g cm <sup>-3</sup>                                                                                                     | 1.977 g cm <sup>-3</sup>                                                                                                     | 1.766 g cm <sup>-3</sup>                                                                                                     |
| Absorption coefficient             | 18.497 mm <sup>-1</sup>                                                                                                      | 15.480 mm <sup>-1</sup>                                                                                                      | 17.634 mm <sup>-1</sup>                                                                                                      | 5.060 mm <sup>-1</sup>                                                                                                       |
| F(000)                             | 2896                                                                                                                         | 2904                                                                                                                         | 2956                                                                                                                         | 2740                                                                                                                         |
| Crystal size (max x mid x min)     | 0.255 x 0.201 x 0.05 mm <sup>3</sup>                                                                                         | 0.17 x 0.16 x 0.16 mm <sup>3</sup>                                                                                           | 0.18 x 0.15 x 0.11 mm <sup>3</sup>                                                                                           | 0.439 x 0.242 x 0.106 mm <sup>3</sup>                                                                                        |
| Theta range for data collection    | 7.06 to 153.522°                                                                                                             | 7.11 to 134.054°                                                                                                             | 7.162 to 134.158°                                                                                                            | 7.042 to 134.158°                                                                                                            |
| Index ranges                       | -21<=h<=22<br>-22<=k<=20<br>-20<=l<=20                                                                                       | -21<=h<=21<br>-19<=k<=21<br>-19<=l<=16                                                                                       | -19<=h<=20<br>-20<=k<=20<br>-19<=l<=18                                                                                       | -21<=h<=20<br>-21<=k<=21<br>-19<=l<=19                                                                                       |
| Reflections collected              | 35749                                                                                                                        | 35230                                                                                                                        | 36897                                                                                                                        | 35166                                                                                                                        |
| Independent reflections            | 5354<br>R(int) = 0.0487                                                                                                      | 4546<br>R(int) = 0.0262                                                                                                      | 4526<br>R(int) = 0.0316                                                                                                      | 4579<br>R(int) = 0.0234                                                                                                      |
| Completeness to theta              | 99.9 %                                                                                                                       | 100 %                                                                                                                        | 100 %                                                                                                                        | 99.9 %                                                                                                                       |
| Absorption correction              | Semi-empirical from equivalents                                                                                              | Semi-empirical from equivalents                                                                                              | Semi-empirical from equivalents                                                                                              | Semi-empirical from equivalents                                                                                              |
| Refinement method                  | Full-matrix least-squares on F <sup>2</sup>                                                                                  |
| Data / restraints / parameters     | 5354 / 42 / 343                                                                                                              | 4546 / 18 / 331                                                                                                              | 4526 / 82 / 369                                                                                                              | 4579 / 3 / 343                                                                                                               |
| Goodness-of-fit on F <sup>2</sup>  | 1.041                                                                                                                        | 1.039                                                                                                                        | 1.070                                                                                                                        | 1.067                                                                                                                        |
| Final R indices [I>2 $\sigma$ (I)] | R <sub>1</sub> = 0.0439<br>wR <sub>2</sub> = 0.1126                                                                          | R <sub>1</sub> = 0.0320<br>wR <sub>2</sub> = 0.0829                                                                          | R <sub>1</sub> = 0.0239<br>wR <sub>2</sub> = 0.0656                                                                          | R <sub>1</sub> = 0.0215<br>wR <sub>2</sub> = 0.0594                                                                          |
| R indices (all data)               | R <sub>1</sub> <sup>a</sup> = 0.0456<br>wR <sub>2</sub> <sup>b</sup> = 0.1142                                                | R <sub>1</sub> = 0.0322<br>wR <sub>2</sub> = 0.0830                                                                          | R <sub>1</sub> = 0.0243<br>wR <sub>2</sub> = 0.0658                                                                          | R <sub>1</sub> = 0.0217<br>wR <sub>2</sub> = 0.0595                                                                          |
| Extinction coefficient             | n/a                                                                                                                          | n/a                                                                                                                          | n/a                                                                                                                          | n/a                                                                                                                          |
| Largest diff. peak and hole        | 0.88 and -0.92 e.Å <sup>-3</sup>                                                                                             | 0.67 and -0.85 e.Å <sup>-3</sup>                                                                                             | 0.58 and -0.62 e.Å <sup>-3</sup>                                                                                             | 0.36 and -0.51 e.Å <sup>-3</sup>                                                                                             |

<sup>a</sup>  $R_1 = \sum(|F_o| - |F_c|) / \sum|F_o|$ . <sup>b</sup>  $wR_2 = [\sum(w(F_o^2 - F_c^2)^2) / \sum(w(F_o^2)^2)]^{1/2}$ ,  $w = 1/[\sigma^2(F_o^2) + ((ap)^2 + bp)]$ , where  $p = [\max(F_o^2, 0) + 2F_c^2]/3$ .

**Table S2.** Shape measures of the 8-coordinate M1 (M = Gd, Tb, Dy, Y) coordination polyhedra in 1·3MeCN, 2·3MeCN, 3·4MeCN and 4·4MeCN, respectively.

| Complex                 | 1·3MeCN     | 2·3MeCN     | 3·4MeCN     | 4·4MeCN     |
|-------------------------|-------------|-------------|-------------|-------------|
| Polyhedron <sup>a</sup> | Gd1         | Tb1         | Dy1         | Y1          |
| OP-8                    | 34.73       | 35.06       | 35.06       | 34.88       |
| HPY-8                   | 21.75       | 21.67       | 21.81       | 22.07       |
| HBPY-8                  | 15.22       | 15.46       | 15.85       | 15.45       |
| CU-8                    | 11.50       | 11.81       | 12.30       | 11.97       |
| SAPR-8                  | 4.83        | 4.77        | 4.85        | 4.69        |
| TDD-8                   | <b>2.87</b> | <b>2.73</b> | <b>2.61</b> | <b>2.57</b> |
| JGBF-8                  | 12.54       | 12.59       | 12.65       | 12.39       |
| JETBPY-8                | 26.85       | 26.96       | 27.31       | 27.12       |
| JBTPR-8                 | 4.57        | 4.52        | 4.54        | 4.27        |
| BTPR-8                  | 3.94        | 3.89        | 3.93        | 3.67        |
| JSD-8                   | 4.64        | 4.52        | 4.43        | 4.28        |
| TT-8                    | 12.28       | 12.59       | 13.06       | 12.71       |
| ETBPY-8                 | 23.19       | 23.15       | 23.44       | 23.46       |

<sup>a</sup> Abbreviations: OP-8, octagon; HPY-8, heptagonal pyramid; HBPY-8, hexagonal bipyramid; CU-8, cube; SAPR-8, square antiprism; TDD-8, triangular dodecahedron; JGBF-8, Johnson gyrobifastigium; JETBPY-8, Johnson elongated triangular bipyramid; JBTPR-8, Johnson biaugmented trigonal prism; BTPR-8, biaugmented trigonal prism; JSD-8, Johnson snub diphenoïd; TT-8, triakis tetrahedron; ETBPY-8, elongated trigonal bipyramid. The values in boldface indicate the closest polyhedron according to the Continuous Shape Measures.

**Table S3.** Bond valence sum (BVS) calculations for O atoms of **1·3MeCN**, **2·3MeCN**, **3·4MeCN** and **4·4MeCN**, respectively, along with the assignment of the corresponding groups.<sup>1</sup>

|           | <b>1·3MeCN</b> | <b>2·3MeCN</b> | <b>3·4MeCN</b> | <b>4·4MeCN</b> | <b>Assignment</b>         |
|-----------|----------------|----------------|----------------|----------------|---------------------------|
| <b>O1</b> | 2.08           | 2.05           | 2.05           | 2.05           | ( $\mu$ -OR) <sup>-</sup> |
| <b>O2</b> | 1.88           | 1.89           | 1.89           | 1.89           | ( $\mu$ -OR) <sup>-</sup> |
| <b>O3</b> | 1.90           | 1.89           | 1.92           | 1.94           | ( $\mu$ -OR) <sup>-</sup> |
| <b>O4</b> | 1.88           | 1.86           | 1.86           | 1.85           | ( $\mu$ -OR) <sup>-</sup> |
| <b>O5</b> | 1.04           | 1.08           | 1.07           | 1.07           | ROH                       |

**Table S4.** Selected interatomic distances (Å) and angles (°) for **1·3MeCN**, **2·3MeCN**, **3·4MeCN** and **4·4MeCN**.

| <b>1·3MeCN</b>                  |          |                                  |          |
|---------------------------------|----------|----------------------------------|----------|
| Bond lengths                    |          |                                  |          |
| Gd(1)-O(1)                      | 2.260(6) | Cu(1)-O(1)                       | 1.894(6) |
| Gd(1)-O(3) <sup>'c</sup>        | 2.273(6) | Cu(1)-O(2)                       | 1.918(6) |
| Gd(1)-O(2) <sup>'''a</sup>      | 2.328(6) | Cu(1)-O(2) <sup>'''a</sup>       | 1.918(6) |
| Gd(1)-O(4) <sup>'c</sup>        | 2.319(6) | Cu(2)-O(3)                       | 1.946(7) |
| Gd(1)-O(6)                      | 2.481(7) | Cu(2)-O(4)                       | 1.925(7) |
| Gd(1)-O(7)                      | 2.498(8) | Cu(2)-N(1)                       | 2.002(8) |
| Gd(1)-O(9)                      | 2.484(9) | Cu(2)-N(2)                       | 2.017(8) |
| Gd(1)-O(10)                     | 2.522(9) | Cu(2)-O(5)                       | 2.397(9) |
| Cu(1)-O(1) <sup>'''a</sup>      | 1.893(6) |                                  |          |
| Bond angles                     |          |                                  |          |
| Cu(1)-O(1)-Gd(1)                | 104.1(3) | Cu(1)-O(2)-Gd(1) <sup>'''a</sup> | 100.8(2) |
| Cu(2)-O(3)-Gd(1) <sup>''b</sup> | 103.6(3) | Cu(2)-O(4)-Gd(1) <sup>''b</sup>  | 102.6(3) |
| <b>2·3MeCN</b>                  |          |                                  |          |
| Bond lengths                    |          |                                  |          |

|                             |          |                             |          |
|-----------------------------|----------|-----------------------------|----------|
| Tb(1)-O(1)                  | 2.244(5) | Cu(1)-O(1)'''' <sup>a</sup> | 1.888(5) |
| Tb(1)-O(3)' <sup>c</sup>    | 2.259(5) | Cu(1)-O(2)                  | 1.912(5) |
| Tb(1)-O(4)' <sup>c</sup>    | 2.302(5) | Cu(1)-O(2)'''' <sup>a</sup> | 1.912(5) |
| Tb(1)-O(2)'''' <sup>a</sup> | 2.325(5) | Cu(2)-O(3)                  | 1.935(6) |
| Tb(1)-O(6)                  | 2.475(5) | Cu(2)-O(4)                  | 1.925(6) |
| Tb(1)-O(7)                  | 2.489(6) | Cu(2)-N(1)                  | 2.004(6) |
| Tb(1)-O(9)                  | 2.481(7) | Cu(2)-N(2)                  | 2.007(6) |
| Tb(1)-O(10)                 | 2.511(7) | Cu(2)-O(5)                  | 2.417(7) |
| Cu(1)-O(1)                  | 1.888(5) |                             |          |

Bond angles

|                                 |          |                                   |          |
|---------------------------------|----------|-----------------------------------|----------|
| Cu(1)-O(1)-Tb(1)                | 104.1(2) | Cu(1)-O(2)-Tb(1)'''' <sup>a</sup> | 100.4(2) |
| Cu(2)-O(3)-Tb(1)'' <sup>b</sup> | 103.8(2) | Cu(2)-O(4)-Tb(1)'' <sup>b</sup>   | 102.6(2) |

**3·4MeCN**

Bond lengths

|                             |          |                             |          |
|-----------------------------|----------|-----------------------------|----------|
| Dy(1)-O(1)                  | 2.227(4) | Cu(1)-O(1)'''' <sup>a</sup> | 1.887(4) |
| Dy(1)-O(3)'' <sup>b</sup>   | 2.249(4) | Cu(1)-O(2)                  | 1.916(4) |
| Dy(1)-O(2)'''' <sup>a</sup> | 2.302(4) | Cu(1)-O(2)'''' <sup>a</sup> | 1.916(4) |
| Dy(1)-O(9)                  | 2.465(4) | Cu(2)-O(3)                  | 1.937(4) |
| Dy(1)-O(4)'' <sup>b</sup>   | 2.291(4) | Cu(2)-O(4)                  | 1.933(4) |
| Dy(1)-O(10)                 | 2.469(4) | Cu(2)-N(1)                  | 1.999(5) |
| Dy(1)-O(7)                  | 2.496(5) | Cu(2)-N(2)                  | 1.997(5) |
| Dy(1)-O(6)                  | 2.459(5) | Cu(2)-O(5)                  | 2.452(6) |
| Cu(1)-O(1)                  | 1.887(4) |                             |          |

Bond angles

|                                |          |                                   |          |
|--------------------------------|----------|-----------------------------------|----------|
| Cu(1)-O(1)-Dy(1)               | 104.2(2) | Cu(1)-O(2)-Dy(1)'''' <sup>a</sup> | 100.5(2) |
| Cu(2)-O(3)-Dy(1)' <sup>c</sup> | 103.8(2) | Cu(2)-O(4)-Dy(1)' <sup>c</sup>    | 102.4(2) |

**4·4MeCN**

Bond lengths

|                            |          |                             |          |
|----------------------------|----------|-----------------------------|----------|
| Y(1)-O(1)                  | 2.215(3) | Cu(1)-O(1)'''' <sup>a</sup> | 1.887(2) |
| Y(1)-O(2)'''' <sup>a</sup> | 2.297(3) | Cu(1)-O(2)                  | 1.920(2) |
| Y(1)-O(3)'' <sup>b</sup>   | 2.239(3) | Cu(1)-O(2)'''' <sup>a</sup> | 1.920(2) |

|                                 |          |                               |          |
|---------------------------------|----------|-------------------------------|----------|
| Y(1)-O(4)'' <sup>b</sup>        | 2.290(3) | Cu(2)-O(3)                    | 1.946(3) |
| Y(1)-O(9)                       | 2.451(3) | Cu(2)-O(4)                    | 1.933(3) |
| Y(1)-O(6)                       | 2.439(3) | Cu(2)-N(1)                    | 2.001(3) |
| Y(1)-O(10)                      | 2.454(3) | Cu(2)-N(2)                    | 2.009(3) |
| Y(1)-O(7)                       | 2.490(3) | Cu(2)-O(5)                    | 2.396(3) |
| Cu(1)-O(1)                      | 1.887(2) |                               |          |
| Bond angles                     |          |                               |          |
| Cu(1)-O(1)-Y(1)                 | 104.6(2) | Cu(2)-O(3)-Y(1)' <sup>c</sup> | 103.4(2) |
| Cu(1)-O(2)-Y(1)''' <sup>a</sup> | 100.5(2) | Cu(2)-O(4)-Y(1)' <sup>c</sup> | 102.0(2) |

<sup>a</sup>''' = 1-x, 1-y, +z; <sup>b</sup>'' = 1-x, +y, 1-z; <sup>c</sup>' = +x, 1-y, 1-z.

**Table S5.** Crystallographically characterized compounds containing the ligand 2-methyl-2-(2-pyridyl)-1,3-propane-diol.

| Compound                                                                                                                                           | Reference |
|----------------------------------------------------------------------------------------------------------------------------------------------------|-----------|
| [Mn <sub>3</sub> Na(L) <sub>4</sub> (MeCO <sub>2</sub> )(MeOH) <sub>2</sub> ](ClO <sub>4</sub> ) <sub>2</sub> ·3H <sub>2</sub> O <sup>a</sup>      | 2         |
| [Mn <sub>3</sub> Na(L) <sub>4</sub> (MeCO <sub>2</sub> )(MeOH) <sub>2</sub> ](ClO <sub>4</sub> ) <sub>2</sub> ·2MeOH·H <sub>2</sub> O <sup>a</sup> | 2         |
| [Cu <sub>3</sub> (LH) <sub>4</sub> ]Cl <sub>2</sub> <sup>a</sup>                                                                                   | 3         |
| [Cu <sub>3</sub> (LH) <sub>4</sub> ](CF <sub>3</sub> SO <sub>3</sub> ) <sub>2</sub> <sup>a</sup>                                                   | 3         |
| [Cu <sub>2</sub> (LH) <sub>2</sub> ]Cl <sub>2</sub> <sup>a</sup>                                                                                   | 3         |
| [Cu <sub>2</sub> (LH) <sub>2</sub> ]Cl <sub>2</sub> (MeOH) <sub>2</sub> <sup>a</sup>                                                               | 3         |
| [Cu(LH <sub>2</sub> ) <sub>2</sub> ](CuCl <sub>4</sub> ) <sup>a</sup>                                                                              | 3         |
| [Cu(LH <sub>2</sub> ) <sub>2</sub> ](CF <sub>3</sub> SO <sub>3</sub> ) <sub>2</sub> <sup>a</sup>                                                   | 3         |

pyridyl)-1,3-propane-diol

<sup>a</sup> H<sub>2</sub>L = 2-methyl-2-(2-

## Physical Measurements/Characterization

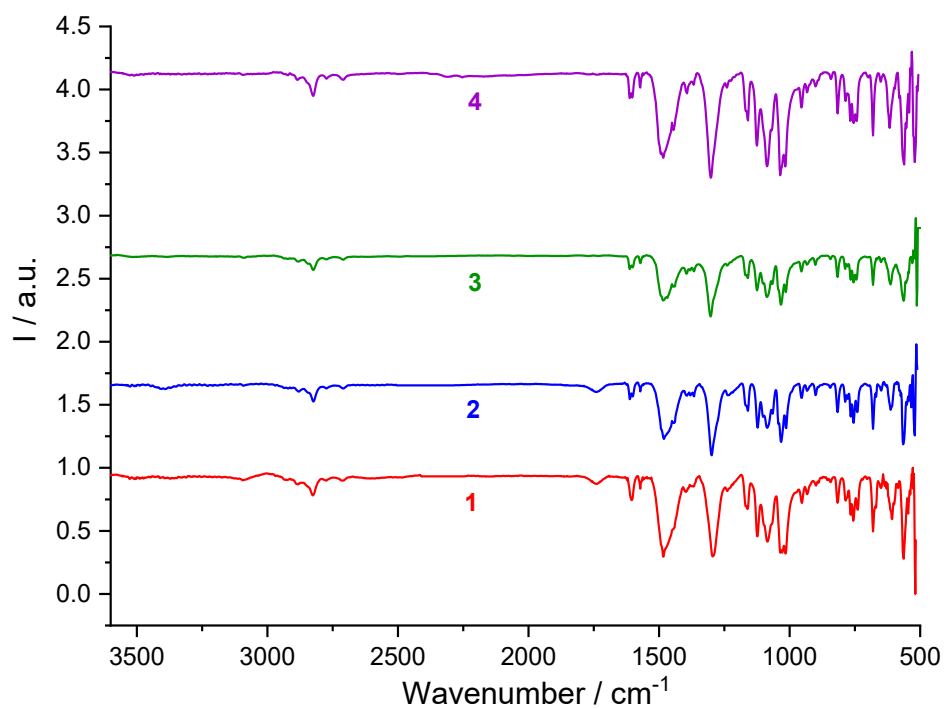

**Figure S1.** IR spectra of compounds **1** - **4**.

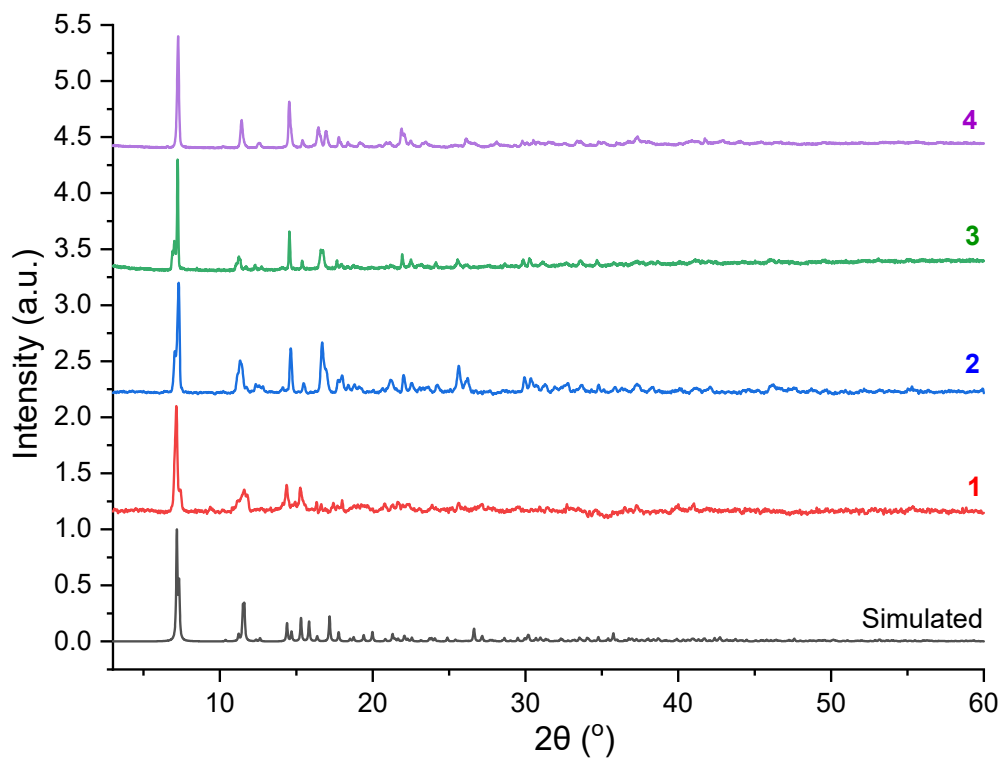

**Figure S2.** Powder X-ray diffraction patterns of compounds **1** - **4**, along with the simulated pattern from the single crystal data.



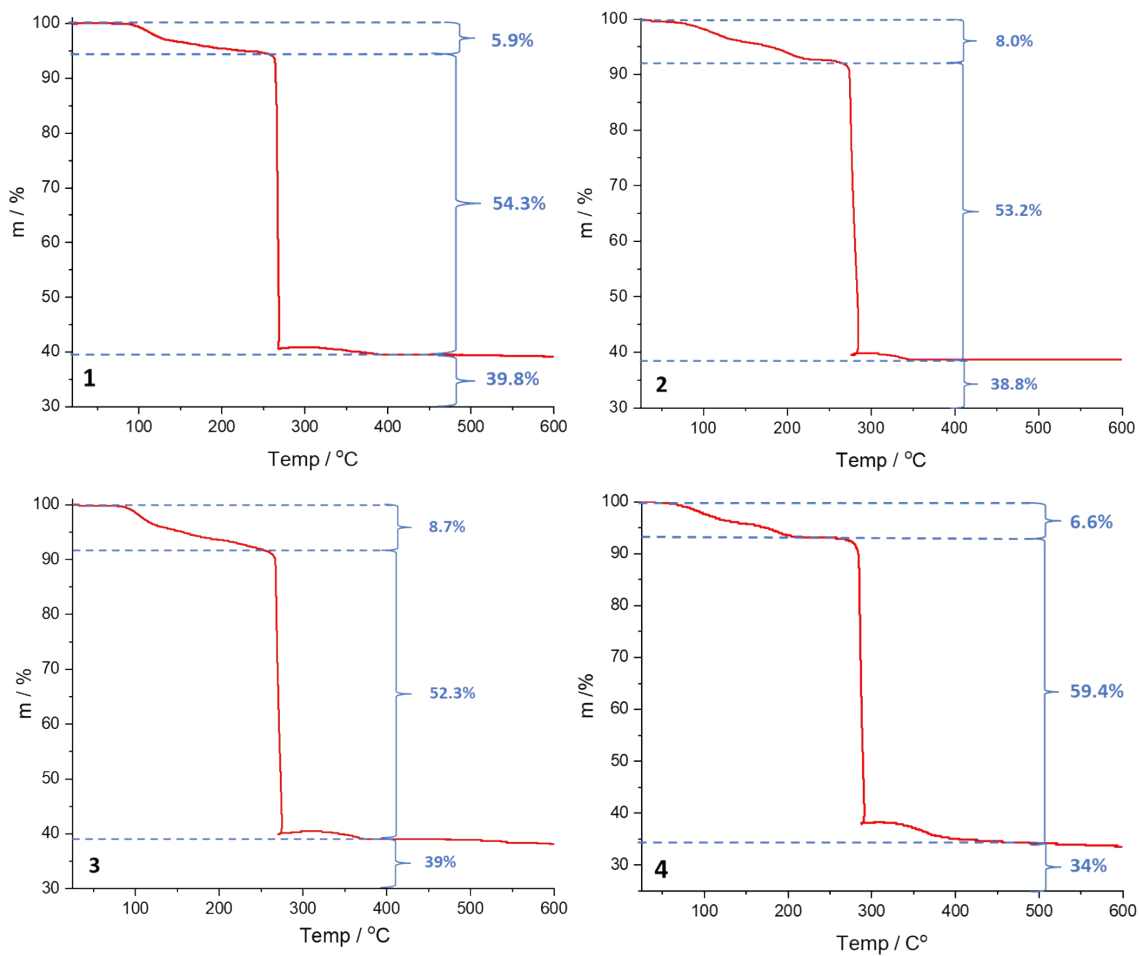

**Figure S3.** TGA graphs of compounds **1 - 4**.

**Table S6.** Calculated values for percentage mass loss of solvent removal and ligand combustion along with the experimental values obtained from TGA analysis of compounds **1** - **4**, respectively.

| Removal of Lattice Solvents |                     |                                     |                   | Ligand Combustion   |                                     | Residual Oxide(s)   |                                     |                                      |
|-----------------------------|---------------------|-------------------------------------|-------------------|---------------------|-------------------------------------|---------------------|-------------------------------------|--------------------------------------|
| Compound                    | Temperature<br>(°C) | Experimental<br>(Calculated)<br>(%) | xH <sub>2</sub> O | Temperature<br>(°C) | Experimental<br>(Calculated)<br>(%) | Temperature<br>(°C) | Experimental<br>(Calculated)<br>(%) | Formula                              |
| <b>1</b>                    | r.t.-240            | 5.9 (6.0)                           | x=10              | 240-400             | 54.3 (54.1)                         | 600                 | 39.8 (39.9)                         | 6CuO/2Gd <sub>2</sub> O <sub>3</sub> |
| <b>2</b>                    | r.t.-240            | 8.0 (8.1)                           | x=14              | 240-400             | 53.2 (52.3)                         | 600                 | 38.8 (39.6)                         | 6CuO/Tb <sub>4</sub> O <sub>7</sub>  |
| <b>3</b>                    | r.t.-240            | 8.7 (8.6)                           | x=15              | 240-400             | 52.3 (52.3)                         | 600                 | 39.0 (39.1)                         | 6CuO/2Dy <sub>2</sub> O <sub>3</sub> |
| <b>4</b>                    | r.t.-240            | 6.6 (6.6)                           | x=10              | 240-400             | 59.4 (59.5)                         | 600                 | 34.0 (33.9)                         | 6CuO/2Y <sub>2</sub> O <sub>3</sub>  |

## Magnetic measurements

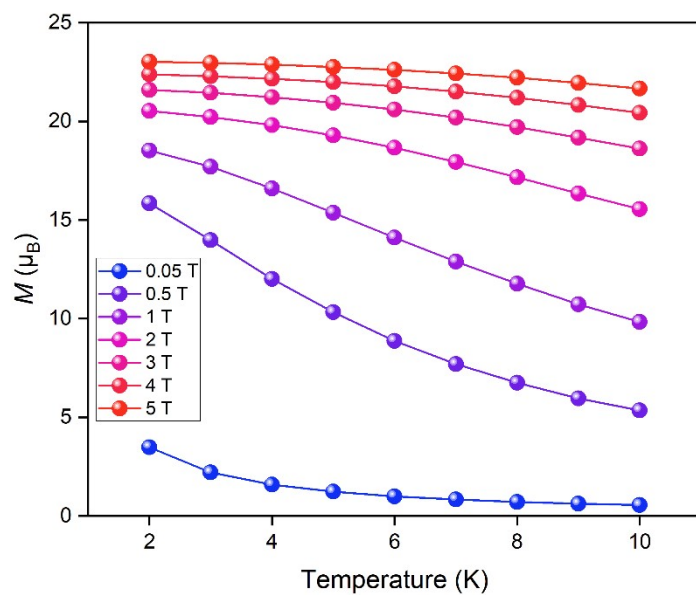

Figure S4. Magnetization ( $M$ ) vs. temperature ( $T$ ) plot for 2.

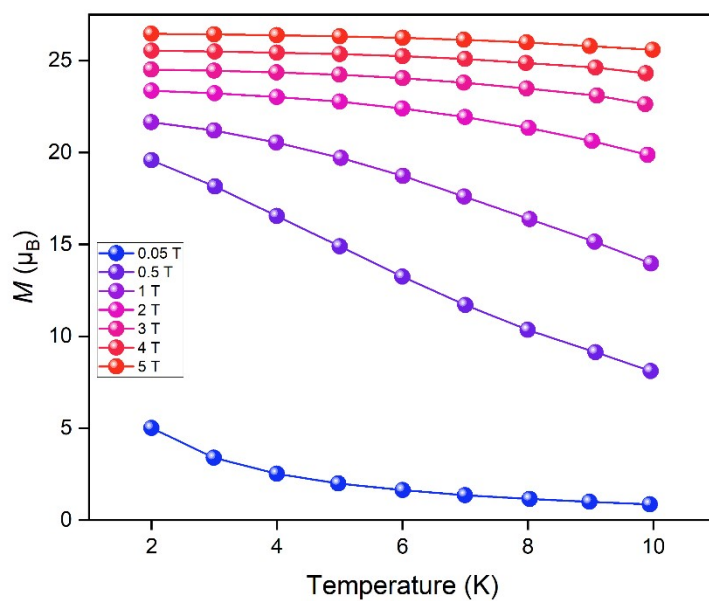

Figure S5. Magnetization ( $M$ ) vs. temperature ( $T$ ) plot for 3.

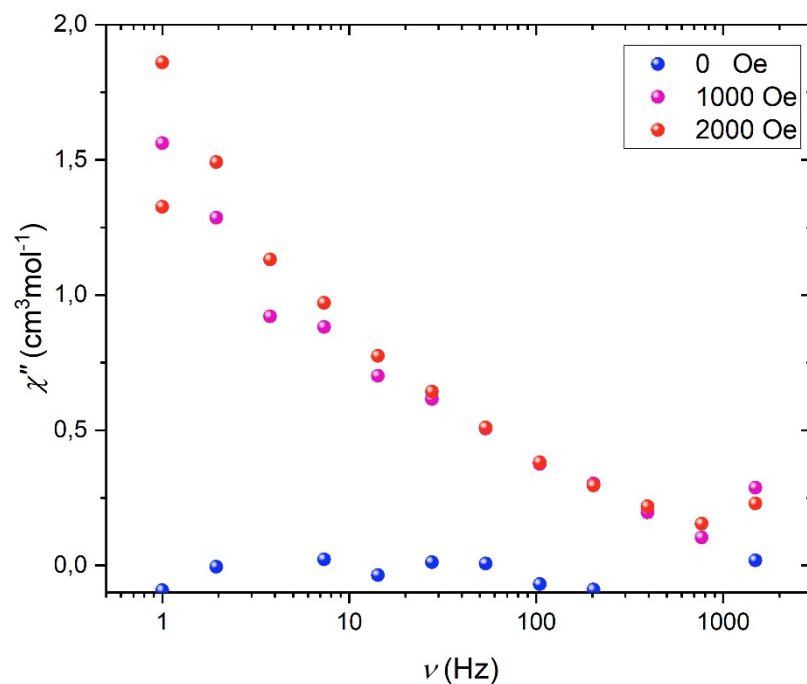

**Figure S6.** Plot of the out-of-phase ( $\chi''_M$ ) signal as  $\chi''_M$  vs.  $\nu$  in a 3.5 G ac field at the indicated applied dc fields for **1** at 2 K.

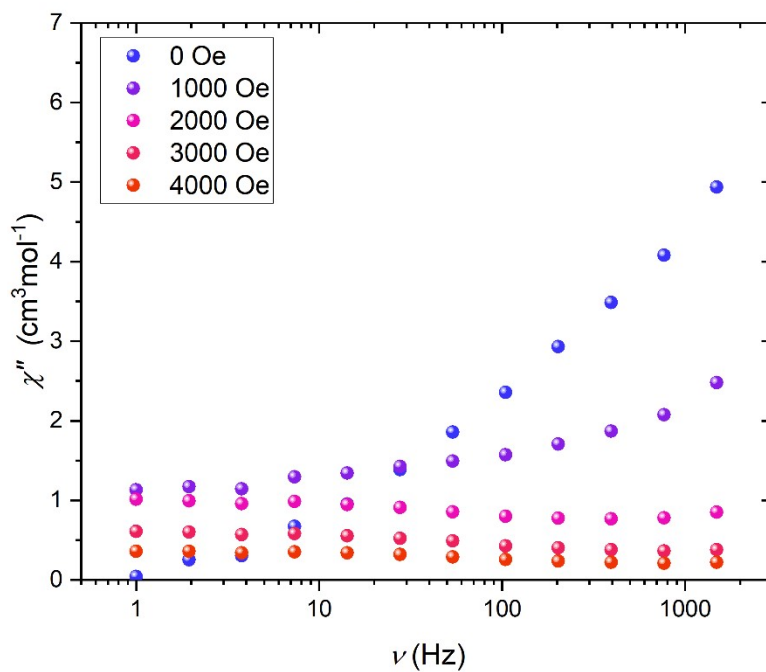

**Figure S7.** Plot of the out-of-phase ( $\chi''_M$ ) signal as  $\chi''_M$  vs.  $\nu$  in a 3.5 G ac field at the indicated applied dc fields for **2** at 2 K.

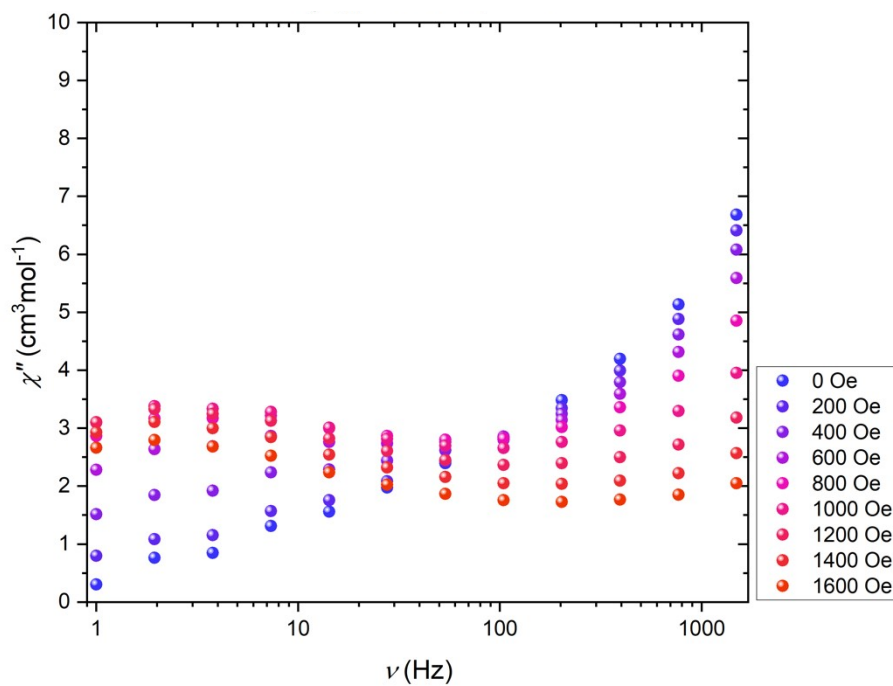

**Figure S8.** Plot of the out-of-phase ( $\chi''_M$ ) signal as  $\chi''_M$  vs.  $\nu$  in a 3.5 G ac field at the indicated applied dc fields for **3** at 2 K.

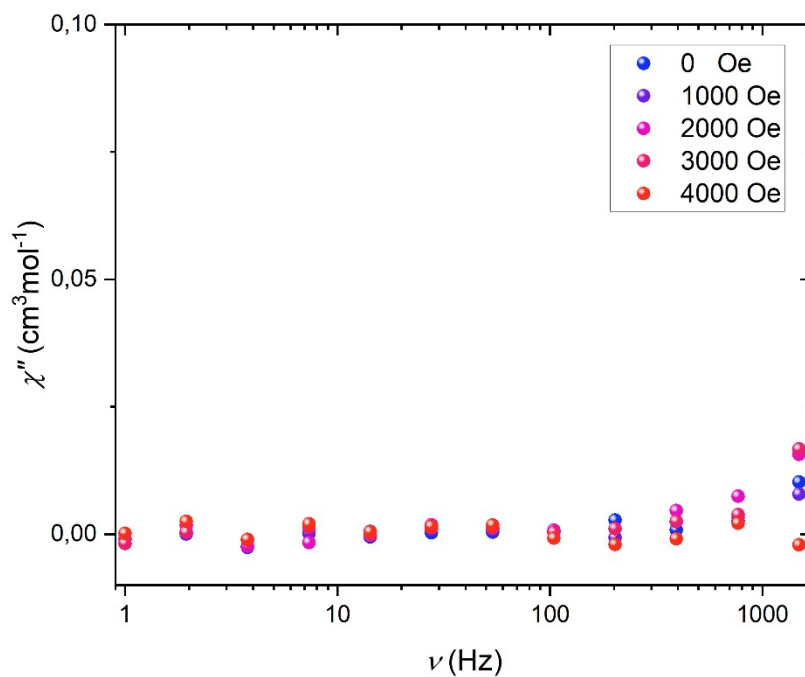

**Figure S9.** Plot of the out-of-phase ( $\chi''_M$ ) signal as  $\chi''_M$  vs.  $\nu$  in a 3.5 G ac field at the indicated applied dc fields for **4** at 2 K.

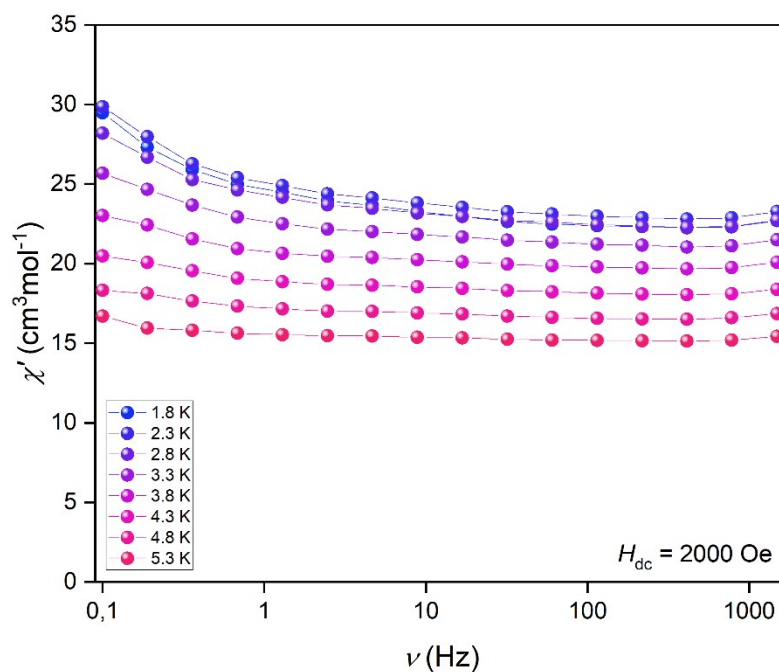

**Figure S10.** Plot of the in-phase ( $\chi'_M$ ) signal as  $\chi'_M$  vs.  $\nu$ , in the presence of a 0.2 T dc field, for 1.

## References

1. I. D. Brown, D. Altermatt, Bond-valence parameters obtained from a systematic analysis of the Inorganic Crystal Structure Database, *Acta Crystallogr., Sect. B*, 1985, **41**, 244-247.
2. S. Mukherjee, Y. P. Patil, P. S. Mukherjee, Two Novel Heterometallic Chains Featuring Mn<sup>II</sup> and Na<sup>I</sup> Ions in Trigonal-Prismatic Geometries Alternately Linked to Octahedral Mn<sup>IV</sup> Ions: Synthesis, Structures, and Magnetic Behavior, *Inorg. Chem.*, 2012, **51**, 4888-4890.
3. L. Yang, D. R. Powell, R. P. Houser, Copper(II) coordination chemistry of 2-methyl-2-(2-pyridyl)-1,3-propan-diol: Syntheses and structures of mono-, di-, and tricopper complexes, *Polyhedron*, 2010, **29**, 1946-1955.
